# Supplementary material for: Prenylcysteine oxidase 1 like protein is required for neutrophil bactericidal activities
Source: Springer Nature journal article supplement (doi:10.1038/s41467-023-38447-z), 2023-05-13

**Supplementary Table 1. List of targeted transcripts**

| <b>Protein</b> | <b>Protein ID</b>     | <b>Function</b>                            |
|----------------|-----------------------|--------------------------------------------|
| Serpinb10      | Q8K1K6                | Unknown                                    |
| Haus6          | Q6NV99                | Unknown                                    |
| Serpinb1a      | Q9D154; Z4YK03;Q8VHP7 | Serine protease inhibitor                  |
| Nedd88         | P29595                | Protein neddylation                        |
| Tmem14c        | Q9CQN6                | Unknown                                    |
| Kmt2b          | O08550;F6W623;F8WJ40  | Epigenetic modifier                        |
| Rheb           | Q921J2                | regulator of mTorc1 pathway                |
| Npm3           | Q9CPP0                | regulator of chromatin remodeling          |
| Pcyox11        | Q8C7K6;A0A0A6YY26     | Unknown                                    |
| Csfr2b         | P26955;P26954         | Member of IL-3, IL-5, and GM-CSF signaling |

| <b>Protein</b> | <b>Fold change<br/>GF/SPF<br/>PMN</b> | <b>(-)log10(P value)</b> | <b>KO cell lines</b> |
|----------------|---------------------------------------|--------------------------|----------------------|
| Serpinb10      | -6.8                                  | 4.04                     | yes                  |
| Haus6          | -5.9                                  | 5.65                     | yes                  |
| Serpinb1a      | -3.5                                  | 5.43                     | yes                  |
| Nedd88         | -4.8                                  | 3.64                     | no                   |
| Tmem14c        | -3.9                                  | 2.16                     | no                   |
| Kmt2b          | -3.4                                  | 1.71                     | yes                  |
| Rheb           | -2.7                                  | 1.87                     | yes                  |
| Npm3           | -1.6                                  | 0.98                     | yes                  |
| Pcyox11        | -3.0                                  | 3.76                     | yes                  |
| Csfr2b         | -2.2                                  | 1.56                     | yes                  |

**Supplementary Table 2. Lentiguide sequences used in the study.**

| <b>Target Sequence</b> | <b>Barcode Sequence</b> | <b>Gene Symbols</b> | <b>Transcripts</b> |
|------------------------|-------------------------|---------------------|--------------------|
| GACACAGGATCAAACGTAAG   | GACACAGGATCAAACGTAAG    | Haus6               | NM_173400.2        |
| AAACTATATGAAAGGCATCA   | AAACTATATGAAAGGCATCA    | Haus6               | NM_173400.2        |
| TTATGTTATGCAAAAATACC   | TTATGTTATGCAAAAATACC    | Haus6               | NM_173400.2        |
| CCCGACGCTGCGTCAAACAG   | CCCGACGCTGCGTCAAACAG    | Kmt2b               | NM_029274.2        |
| GTGAACCCTCTACTCCCCGA   | GTGAACCCTCTACTCCCCGA    | Kmt2b               | NM_029274.2        |
| CCGGGGTGTCTTGATAACAC   | CCGGGGTGTCTTGATAACAC    | Kmt2b               | NM_029274.2        |
| AACAAACTGAATTGTCAATG   | AACAAACTGAATTGTCAATG    | Rheb                | NM_053075.3        |
| ATTCATGACAGAGGACACAA   | ATTCATGACAGAGGACACAA    | Serpinb1a           | NM_025429.2        |
| AATGCTGAAGTGAGCAAACG   | AATGCTGAAGTGAGCAAACG    | Serpinb1a           | NM_025429.2        |
| ATCCCAGAACTGTTGTCTGT   | ATCCCAGAACTGTTGTCTGT    | Serpinb1a           | NM_025429.2        |
| CACCACATTACACTCGTCCG   | CACCACATTACACTCGTCCG    | Npm3                | NM_008723.2        |
| GCACGTGCTGGCGTTGAACA   | GCACGTGCTGGCGTTGAACA    | Npm3                | NM_008723.2        |
| TCAGGAGATTGCAGTTCCTG   | TCAGGAGATTGCAGTTCCTG    | Npm3                | NM_008723.2        |
| TACACTTGAAGACTGACTG    | TACACTTGAAGACTGACTG     | Csf2rb              | NM_007780.4        |
| GAAGAAATCGGACAGCTGGG   | GAAGAAATCGGACAGCTGGG    | Csf2rb              | NM_007780.4        |
| TGGAGACTGTAGGCATCCTG   | TGGAGACTGTAGGCATCCTG    | Csf2rb              | NM_007780.4        |
| CAGTGAAAAGCACCACCGAA   | CAGTGAAAAGCACCACCGAA    | Serpinb10           | NM_198028.3        |
| TGAGGTCACGGTTCTGATAG   | TGAGGTCACGGTTCTGATAG    | Serpinb10           | NM_198028.3        |
| TGTCGACTGAGTCATCTGGG   | TGTCGACTGAGTCATCTGGG    | Serpinb10           | NM_198028.3        |
| TGCCGTAGTACCACCAGAGG   | TGCCGTAGTACCACCAGAGG    | Pcyox11             | NM_172832.4        |
| ACCGCCGGGGAAAATCGGTG   | ACCGCCGGGGAAAATCGGTG    | Pcyox11             | NM_172832.4        |
| GCAGAACTACGAGAGCGGGG   | GCAGAACTACGAGAGCGGGG    | Pcyox11             | NM_172832.4        |
| TTTACCAGACGAATTGTACG   | TTTACCAGACGAATTGTACG    | Cybb                | NM_007807.5        |
| CCTCTACCAAAACCATTCGG   | CCTCTACCAAAACCATTCGG    | Cybb                | NM_007807.5        |
| ATTCTAACTTGGATACCTTG   | ATTCTAACTTGGATACCTTG    | Cybb                | NM_007807.5        |

**Supplementary Table 3A. List of prenylated proteins enriched in GCSF-matured WT PMNs compared to *Pcyox1l* CRISPRed PMNs.**

| Protein names                                     | Gene names        | Type of Prenylation               | Log(2) Fold Ch    | -LOG(P-value)     |
|---------------------------------------------------|-------------------|-----------------------------------|-------------------|-------------------|
| Cell division control protein 42 homolog          | Cdc42             | Geranylgeranylation type 1        | 2.75254753        | -1.8215055        |
| Rho-related GTP-binding protein RhoB              | Rhob              | Geranylgeranylation type 1        | 3.19885095        | -0.5773716        |
| <b>Ras-related C3 botulinum toxin substrate 1</b> | <b>Rac1</b>       | <b>Geranylgeranylation type 1</b> | <b>2.9445417</b>  | <b>-1.8386011</b> |
| Rho-related GTP-binding protein RhoG              | Rhog              | Geranylgeranylation type 1        | 3.05428768        | -1.5177444        |
| <b>Ras-related C3 botulinum toxin substrate 2</b> | <b>Rac2</b>       | <b>Geranylgeranylation type 1</b> | <b>1.85856705</b> | <b>-0.8812755</b> |
| Ras-related protein Rap-2c;Ras-related protein    | Rap2c;Rap2a;Rap2b | Geranylgeranylation type 1        | 2.03510135        | -0.7344001        |
| GTP-binding protein Rheb                          | Rheb              | Geranylgeranylation type 1        | 1.92246814        | -0.5751918        |
| Ras-related protein Rap-1b;Ras-related protein    | Rap1b;Rap1a       | Geranylgeranylation type 1        | 2.68866558        | -1.5317367        |
| Guanine nucleotide-binding protein G(I)/G(S)/G    | Gng12             | Geranylgeranylation type 1        | 2.55431625        | -1.6207851        |
| Transforming protein RhoA;Rho-related GTP-bir     | Rhoa;Rhoc         | Geranylgeranylation type 1        | 2.32947802        | -1.6419738        |
| Ras-related protein Rab-5C                        | Rab5c             | Geranylgeranylation type 2        | 2.86909383        | -1.5738827        |
| Ras-related protein Rab-6A                        | Rab6a             | Geranylgeranylation type 2        | 2.58116403        | -1.7104025        |
| Ras-related protein Rab-21                        | Rab21             | Geranylgeranylation type 2        | 1.00483721        | -0.5470356        |
| Ras-related protein Rab-22A                       | Rab22a            | Geranylgeranylation type 2        | 1.5646381         | -0.7479687        |
| Ras-related protein Rab-24                        | Rab24             | Geranylgeranylation type 2        | 1.38510805        | -0.5991659        |
| Ras-related protein Rab-18                        | Rab18             | Geranylgeranylation type 2        | 1.35523952        | -0.7173535        |
| Ras-related protein Rab-11B;Ras-related protein   | Rab11b;Rab11a     | Geranylgeranylation type 2        | 2.65998505        | -1.2626944        |
| Ras-related protein Rab-7a                        | Rab7a             | Geranylgeranylation type 2        | 2.7300966         | -1.3273878        |
| Ras-related protein Rab-2A;Ras-related protein    | Rab2a;Rab2b       | Geranylgeranylation type 2        | 2.08701157        | -1.1250829        |
| Ras-related protein Rab-8A                        | Rab8a             | Geranylgeranylation type 2        | 2.15197885        | -0.9220635        |
| Ras-related protein Rab-5B                        | Rab5b             | Geranylgeranylation type 2        | 2.73221682        | -1.3339274        |
| Ras-related protein Rab-10                        | Rab10             | Geranylgeranylation type 2        | 2.10590601        | -1.4668709        |
| Ras-related protein Rab-8B                        | Rab8b             | Geranylgeranylation type 2        | 2.24638011        | -1.0269791        |
| Ras-related protein Rab-1A                        | Rab1A             | Geranylgeranylation type 2        | 2.61675725        | -1.6751375        |
| Ras-related protein Rab-35                        | Rab35             | Geranylgeranylation type 2        | 2.38947703        | -1.2588383        |
| Ras-related protein Rab-14                        | Rab14             | Geranylgeranylation type 2        | 2.58291299        | -1.0496696        |
| Ras-related protein Rab-31                        | Rab31             | Geranylgeranylation type 2        | 2.45771104        | -1.0418634        |
| Ras-related protein Rab-5A                        | Rab5a             | Geranylgeranylation type 2        | 3.39175514        | -1.3012088        |
| Ras-related protein Rab-1B                        | Rab1b             | Geranylgeranylation type 2        | 3.54272047        | -2.4545457        |
| Ras-related protein Rab-9A                        | Rab9a             | Geranylgeranylation type 2        | 1.90935513        | -0.849204         |
| Lamin-B1                                          | Lmnb1             | Farnesylation                     | 2.68364935        | -0.9736382        |
| DnaJ homolog subfamily A member 1                 | Dnaja1            | Farnesylation                     | 1.79234602        | -1.016483         |
| Ras-related protein Ral-A                         | Rala              | Farnesylation                     | 3.0462695         | -1.0650377        |
| Nucleosome assembly protein 1-like 4;Nucleos      | Nap1l4;Nap1l1     | Farnesylation                     | 2.95842278        | -0.5691443        |
| Guanine nucleotide-binding protein G(I)/G(S)/G    | Gng5              | Farnesylation                     | 0.92897731        | -0.7458928        |
| PC4 and SFRS1-interacting protein                 | Psip1             | Farnesylation                     | 2.67280728        | -0.6504927        |
| Synaptobrevin homolog YKT6                        | Ykt6              | Farnesylation                     | 2.8481914         | -1.4107345        |
| Ras-related protein Ral-B                         | Ralb              | Farnesylation                     | 4.23374922        | -1.3733047        |

**Supplementary Table 3B. List of prenylated proteins enriched in WT progenitors.**

| Protein names                                                  | Gene names                    | Type of Prenylation   | Log(2) Fold Ch | -LOG(P-value) |
|----------------------------------------------------------------|-------------------------------|-----------------------|----------------|---------------|
| Cell division control protein 42 homolog                       | Cdc42                         | Geranylgeranylation 1 | 1.28364094     | -6.2099741    |
| Ras-related protein Rap-1b;Ras-related protein Rap1a           | Rap1b;Rap1a                   | Geranylgeranylation 1 | 2.52261712     | -3.0109952    |
| Ras-related C3 botulinum toxin substrate 1                     | Rac1                          | Geranylgeranylation 1 | 3.0891438      | -2.4630578    |
| Rho-related GTP-binding protein RhoG                           | Rhog                          | Geranylgeranylation 1 | 2.63960239     | -1.3425152    |
| Ras-related C3 botulinum toxin substrate 2                     | Rac2                          | Geranylgeranylation 1 | 1.56550884     | -0.9071965    |
| GTP-binding protein Rheb                                       | Rheb                          | Geranylgeranylation 1 | 1.69720313     | -0.9672456    |
| Guanine nucleotide-binding protein G(I)/G(S)                   | Gng12                         | Geranylgeranylation 1 | 3.3505552      | -3.1896463    |
| Transforming protein RhoA;Rho-related GTP-binding protein RhoB | Rhoa;4930544 G11Rik;Rhoc;Rhob | Geranylgeranylation 1 | 1.40186843     | -1.0526458    |
| Ras-related protein Rab-5C                                     | Rab5c                         | Geranylgeranylation 2 | 3.27679204     | -2.5973637    |
| Ras-related protein Rab-6A;Ras-related protein Rab6b           | Rab6a;Rab6b                   | Geranylgeranylation 2 | 3.05722766     | -2.6708138    |
| Ras-related protein Rab-21                                     | Rab21                         | Geranylgeranylation 2 | 1.85963083     | -0.4779242    |
| Ras-related protein Rab-18                                     | Rab18                         | Geranylgeranylation 2 | 2.45197436     | -1.2604737    |
| Ras-related protein Rab-11B;Ras-related protein Rab11a         | Rab11b;Rab11a                 | Geranylgeranylation 2 | 3.24460884     | -2.3067658    |
| Ras-related protein Rab-7a                                     | Rab7a                         | Geranylgeranylation 2 | 2.33607252     | -1.4297007    |
| Ras-related protein Rab-2A;Ras-related protein Rab2b           | Rab2a;Rab2b                   | Geranylgeranylation 2 | 3.19356481     | -2.4180093    |
| Ras-related protein Rab-8A                                     | Rab8a                         | Geranylgeranylation 2 | 2.62059712     | -1.7222823    |
| Ras-related protein Rab-5B                                     | Rab5b                         | Geranylgeranylation 2 | 3.18270866     | -2.4208945    |
| Ras-related protein Rab-10                                     | Rab10                         | Geranylgeranylation 2 | 2.89541107     | -2.5077335    |
| Ras-related protein Rab-8B                                     | Rab8b                         | Geranylgeranylation 2 | 2.44661162     | -1.4248942    |
| Ras-related protein Rab-1A                                     | Rab1A                         | Geranylgeranylation 2 | 3.22069376     | -2.4929376    |
| Ras-related protein Rab-35                                     | Rab35                         | Geranylgeranylation 2 | 2.90012331     | -3.4156356    |
| Ras-related protein Rab-14                                     | Rab14                         | Geranylgeranylation 2 | 3.18360829     | -3.0002612    |
| Ras-related protein Rab-32                                     | Rab32                         | Geranylgeranylation 2 | 1.49533315     | -1.0304669    |
| Ras-related protein Rab-1B                                     | Rab1b                         | Geranylgeranylation 2 | 3.02226613     | -2.479686     |
| Ras-related protein Rab-9A                                     | Rab9a                         | Geranylgeranylation 2 | 3.02733546     | -2.9844337    |
| Lamin-B1                                                       | Lmnb1                         | Farnesylation         | 1.18412542     | -0.9027187    |
| DnaJ homolog subfamily A member 1                              | Dnaja1                        | Farnesylation         | 2.9619837      | -1.0671862    |
| Ras-related protein Ral-A                                      | Rala                          | Farnesylation         | 2.0768098      | -1.0090076    |
| Nucleosome assembly protein 1-like 4                           | Nap1l4                        | Farnesylation         | 2.46986341     | -0.3755295    |
| Synaptobrevin homolog YKT6                                     | Ykt6                          | Farnesylation         | 2.77775836     | -1.9541803    |
| DnaJ homolog subfamily A member 2                              | Dnaja2                        | Farnesylation         | 2.80818152     | -2.7287806    |



## Supplementary Figures

**Supplementary Figure 1. Heatmap of column correlation by Euclidean distance for proteomic samples show of replicate reproducibly.** Neutrophils were purified from non-infected and *P. aeruginosa*-infected SPF and GF SW mice, lysates were trypsin digested, and proteomes solved using LC-MS/MS. Proteome samples were clustered based on Euclidean distance using the 'column correlation' parameter in Perseus. Heatmap range represents reproducibility (as a percentage) across samples with the lowest reproducibility across biological replicates at 84% and highest reproducibility at 94%. The experiment was performed in quadruplicate. SW mice as SPF or GF samples at baseline = uninfected; SW mice as SPF or GF infected = *P. aeruginosa*-infected.

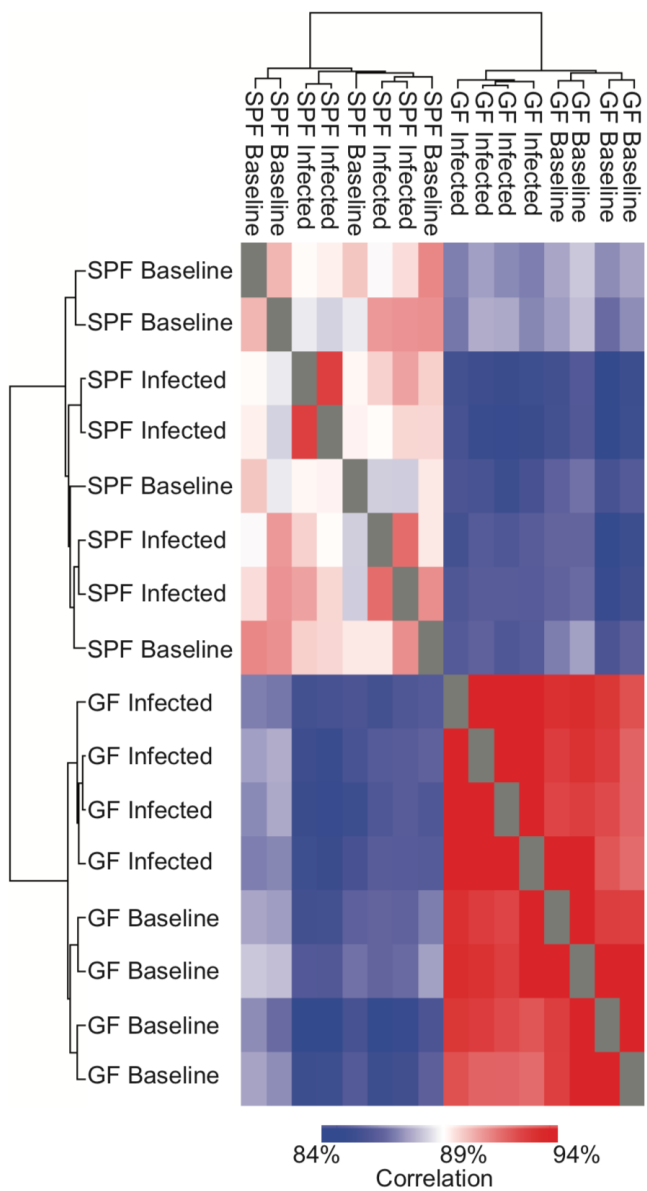

**Supplementary Figure 2. Validation of Pcyox11 absence in the generated *Pcyox11***

**CRISPRed progenitor cell lines and matured PMNs. a.** WB analysis for Pcyox11 presence in

WT (control neutrophil cell line, lane 2) and two different *Pcyox11* CRISPR-ed murine clones (F4 and F6, lanes 3 and 4) where the Pcyox11 expression was CRISPRed out. Protein lysates were harvested from *in vitro* matured with vehicle (FBS) PMNs on day 3. Cell lysates were prepared with RIPA buffer and 8µg total lysate was loaded onto Bis-Tris gel. The membrane was probed with anti-Pcyox11 and hFAB Rhodamine GAPDH primary antibodies. Data are representative of two independent experiments (N=2). **b.** WB analysis for Pcyox11 in WT (control neutrophil cell line) and *Pcyox11* CRISPR-ed clones (F4 and F6) stimulated with 20 ng/ml GCSF, or 20 ng/ml GCSF with 5 ng/ml GM-CSF. Protein lysates were prepared using matured cells and WB for Pcyox11 was performed. The Pcyox11 and GAPDH WB images are overlaid with the Stainfree image of the same WB to generate composite images. Data are representative of two independent experiments (N=2). Cumulatively, data confirm successful generation of *Pcyox11* CRISPRed KO PMNs.

**a**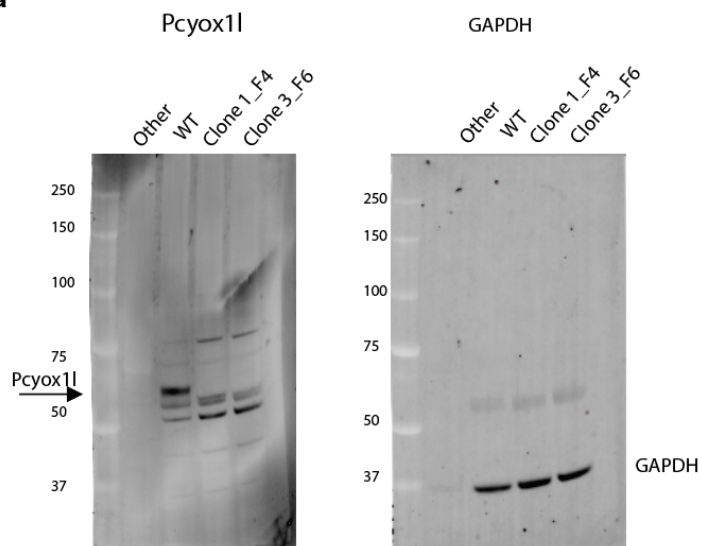**b**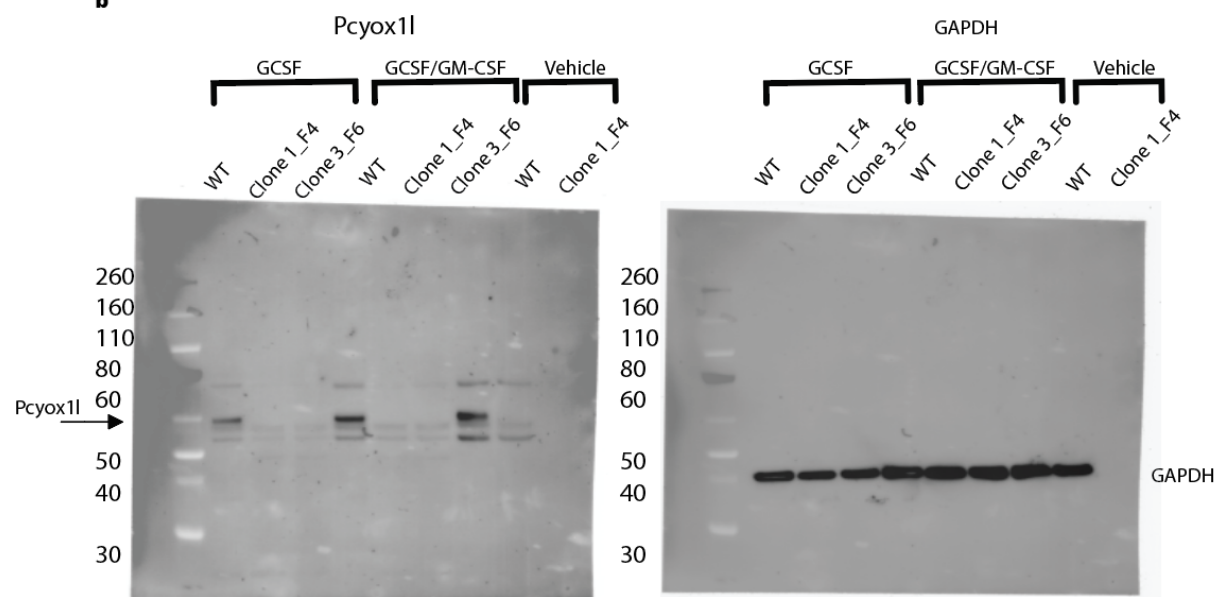

**Supplementary Figure 3. WT and *Pcyox1l* CRISPRed progenitor cell lines produce**

**multilobed PMNs upon in vitro maturation.** WT and *Pcyox1l* CRISPRed PMNs are matured under vehicle (10% FBS), 20 ng/ml GCSF, or 20 ng/ml GCSF with 5 ng/ml GM-CSF for 72 hours. Cell suspensions were spun onto Superfrost slides and stained with Haematoxylin and eosin. Samples were visualized with an Olympus CX23 microscope with a 40X objective.

Percentages of cells that displayed multilobed nucleus which is indicative of neutrophils were counted in biological replicas. 1) vehicle-matured WT (open bar, N=21) and *Pcyox1l* CRISPRed PMNs (red bar, N=30), unpaired two-tailed *t*-test with Welch's correction,  $P < 0.0001$ ; 2) GCSF-matured WT (open bar, N=16) and *Pcyox1l* CRISPRed PMNs (red bar, N=25), unpaired two-tailed *t*-test with Welch's correction,  $P = \text{ns}$ ; 3) GCSF and GM-CSF-matured WT (open bar, N=11) and *Pcyox1l* CRISPRed PMNs (red bar, N=24), unpaired two-tailed *t*-test with Welch's correction,  $P = \text{ns}$ . N=number of biological replica. N.s.=not significant. Data are means  $\pm$  SD. Data are presented cumulatively from at least three independent experiments. Source data are provided as a Source Data file. Data verify the predominance of WT banded/multilobed neutrophils in cell cultures upon different maturation conditions.

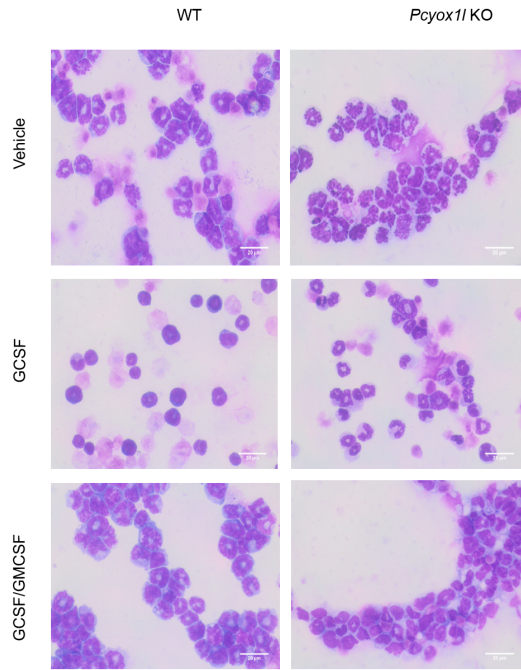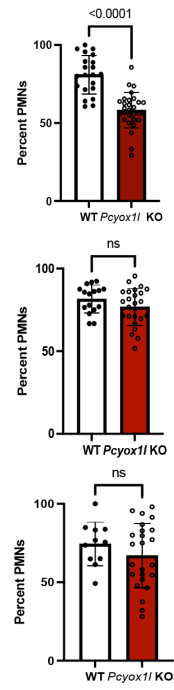

**Supplementary Figure 4. *Pcyox11* deficiency is associated with reduced PMN bactericidal and opsonophagocytic activities.** **a.** *In vitro*-matured WT (black line, N=4) and *Pcyox11* CRISPRed PMNs (red line, N=3) was used to measure *Pseudomonas aeruginosa*-induced reactive oxygen species (ROS) release. The cells were dispensed into white 96 well plates ( $2 \times 10^6$  cells per well) and incubated with 12.5 uM luminol sodium salt and 5 U of horseradish peroxidase at 37°C for 5 min. After that, the cells were infected with *P. aeruginosa* 6294 at MOI of 10 in the absence of opsonic anti-*P. aeruginosa* MoAb. Luminescence (relative light units, RLU) was measured at 470 nm wavelength. Data are presented as mean values with SD. 2-way ANOVA with P=0.001. Data are representative of three independent experiments (N=3). **b.** *P. aeruginosa*-induced ROS release was measured in *in vitro*-matured WT (black line, N=2) and *Pcyox11* CRISPRed PMNs (red line, N=2) in the presence of opsonizing antibody. Data are presented as mean values with std. 2-way ANOVA with calculated time and genotype source of variation P=0.001. Data are representative of three independent experiments (N=3). **c.** *Pcyox11* CRISPRed PMNs show defects in opsonophagocytosis of PAO1. Opsonophagocytic assays with *P. aeruginosa* PAO1 was performed in the presence of opsonic anti-*P. aeruginosa* MoAb (anti-Psl). Vehicle, GCSF, and GCSF-GMCSF-matured cells WT (CRISPRed for GFP) (open bars, N=5) and *Pcyox11* CRISPRed KO (red bars, N=5) clone were incubated with 10% murine serum, anti-*P. aeruginosa* MoAb (28.6 ng/uL), and *P. aeruginosa* PAO1 strain at an MOI of 1:100 for 90 min at 37°C on a rotator. Aliquots taken at 0 and 90 min, serially diluted, and plated on MacConkey agar to determine viable *P. aeruginosa*. Percent killing was calculated as a ratio of colony-forming unit (CFU) at T90 over the spontaneous bacterial growth in the samples without PMNs or T0. Data are mean values and presented with SD. One-way ANOVA, P<0.0001.

Source data are provided as a Source Data file. Cumulatively data show reduced opsonophagocytic killing and ROS release in the absence of *Pcyox11*.

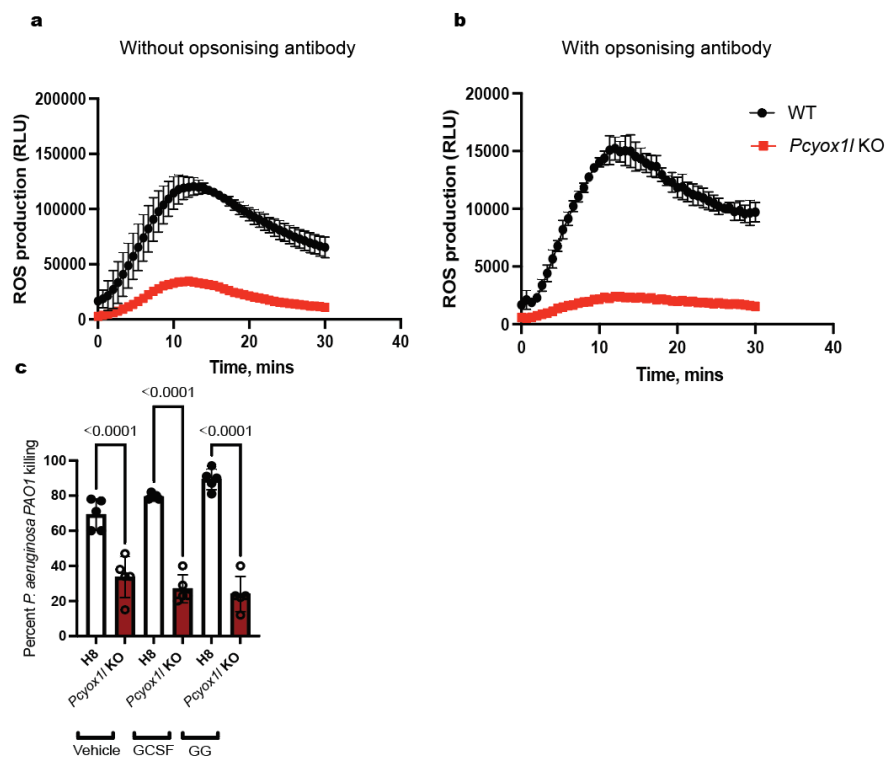



**Supplementary Figure 5. *Pcyox11* KO neutrophils show reductions in prenylated proteins associated with respiratory burst and phagocytosis implicating a connection between PMN functions and prenylation state.** **a.** Significantly elevated prenylated proteins in WT neutrophils are visualized using publicly available String software and reveal a highly enriched in interactions network ( $p < 1.0 \times 10^{-16}$ ). **b.** GO pathway analysis lists the biological processes enriched in the network. The measurement of “strength” describes how large is the enrichment effect. It is calculated as a ratio between the number of proteins in the network versus the number of proteins expected to be associated with this term in a random network. Data show enrichment for proteins involved in respiratory burst (colored in blue, FDR 0.002), phagosome maturation (colored in pink, FDR 0.001), phagosome assembly (colored in yellow, FDR 0.02), and phagocytosis engulfment (colored in green, FDR 0.0002). Cumulatively, the bioinformatic analysis point to defects in phagocytosis consistent with the reductions in *de novo* prenylation of small GTPase at steady state.

a

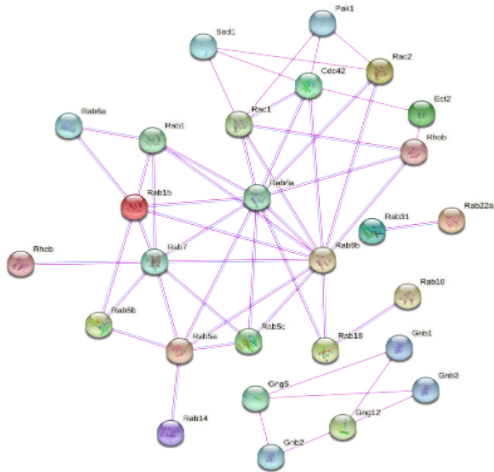

b

| GO term    | Description                            | Count in network | Strength | FDR    |
|------------|----------------------------------------|------------------|----------|--------|
| GO:0060263 | Regulation of respiratory burst (blue) | 2/14             | 1.94     | 0.025  |
| GO:0090382 | Phagosome maturation (pink)            | 3/22             | 1.92     | 0.001  |
| GO:0001845 | Phagosome assembly (yellow)            | 2/15             | 1.91     | 0.002  |
| GO:0006911 | Phagocytosis engulfment (green)        | 4/44             | 1.75     | 0.0002 |

**Supplementary Figure 6. BM *Pcyox11* KO PMNs have detectable *Pcyox1* levels.** BM-derived PMNs from non-infected and infected with *P. aeruginosa* WT (lanes 1 and 2) and *Pcyox11* KO (lanes 3 and 4) mice were purified, lysed in RIPA buffer and 25µg total lysate loaded on SDS-PAGE. Samples were loaded twice onto the same gel. The membrane was cut in half and each half was probed with either anti-*Pcyox1* (left image) or anti-*Pcyox11* (right image) primary antibodies. PageRuler Plus protein ladder served as standard. Images represent uncropped WB data. Data are representative of two independent experiments (N=2). Data show detectable *Pcyox1* in all samples including the *Pcyox11* KO PMNs.

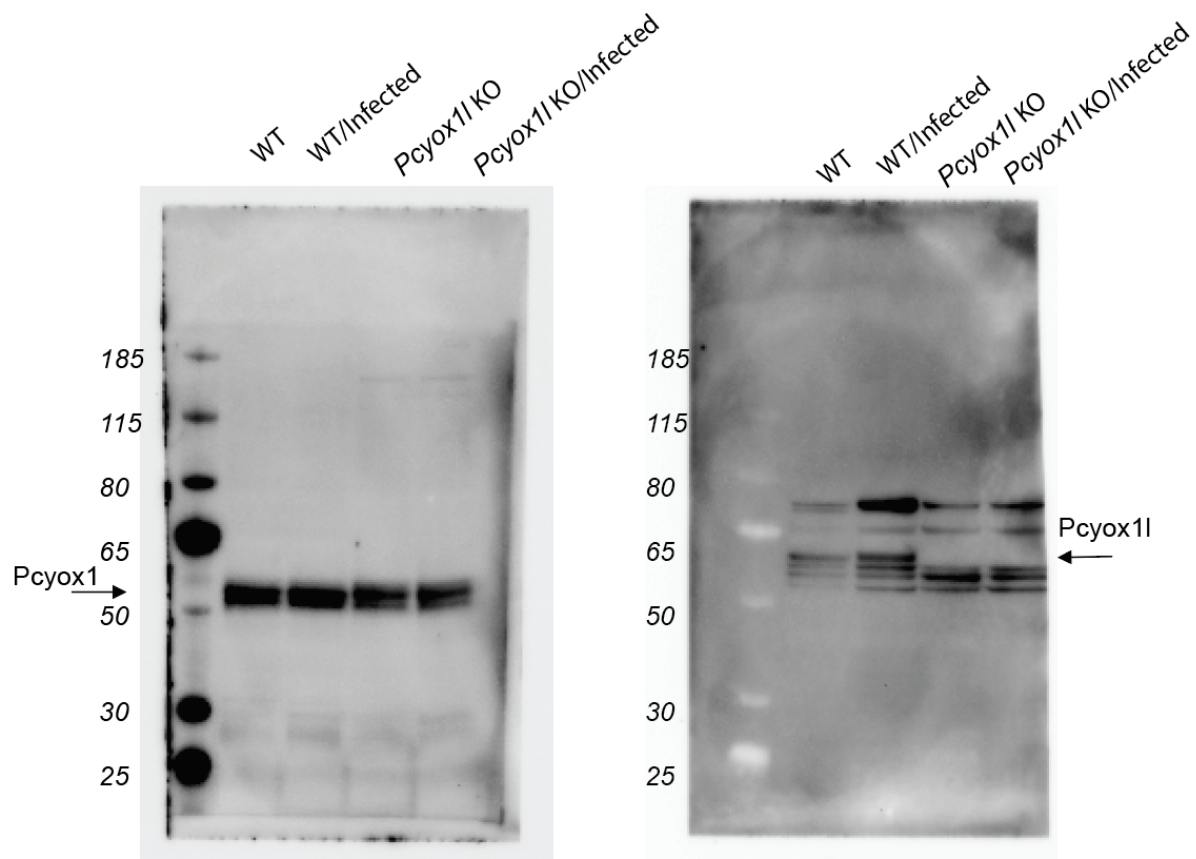

**Supplementary Figure 7.** Gating strategy for flow cytometry-based analysis of *in vitro* matured WT, *Pcyox11*, and *Serpin B1a* CRISPRed clones. Viable cells were gated on FSC vs SSC, selecting 7AAD<sup>-</sup>, Siglec F<sup>-</sup>, to plot CXCR2 and CD11b. Mature granulocytes were determined as CD11b<sup>+</sup>, CXCR2<sup>+</sup>, SiglecF<sup>-</sup> cells.

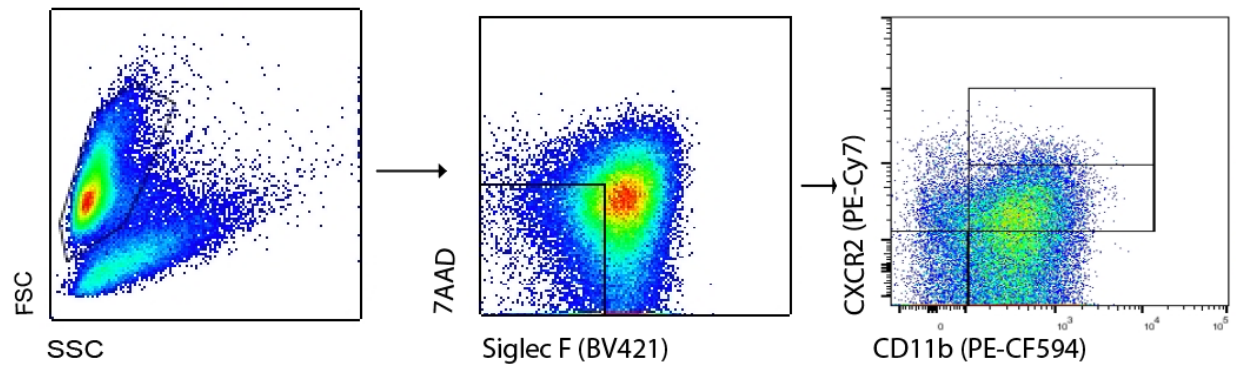

**Supplementary Figure 8. *Pcyox11* CRISPRed neutrophils show diminished viability.**

**a.** Experimental workflow. WT and *Pcyox11* CRISPRed GMPs were matured under different conditions *in vitro* including vehicle, 20 ng/ml GCSF and 20 ng/ml GCSF combined with 5 ng/ml GM-CSF. Cells were used for immunophenotyping at either D3 or D5 post-maturation. **b.** WT PMNs were treated with 10  $\mu$ M cismethynil for 3 days before viability analysis. Viable cells were quantified using Trypan Blue exclusion staining. Percent viable cells are plotted. Each symbol represents individual comparisons for cismethynil-treated vehicle matured WT PMNs (N=4), cismethynil-treated GCSF matured WT PMNs (N=4), cismethynil-treated GCSF, GM-CSF matured WT PMNs (N=4). Data are presented as mean values with SD. Ordinary one-way ANOVA with overall  $P < 0.0001$  followed by Sidak's multiple comparison test for vehicle- and GCSF-matured PMNs  $P = 0.0001$  and  $P = 0.0001$  respectively. Data show that inhibition of prenylation by cismethynil decreases cellular viability of *in vitro* matured WT PMNs, a phenotype similar to that of the *Pcyox11* CRISPRed PMNs **c.** WT, *Pcyox11* and *SerpinB1a* CRISPRed GMPs were matured *in vitro* and immunophenotyped by flow cytometry at D5 post-maturation. Mature neutrophils were defined as viable, SiglecF<sup>-</sup>, CD11b<sup>+</sup>, CXCR2<sup>+</sup> cells. Representative images of histograms from matured WT, *Pcyox11* KO, and *SerpinB1a* KO PMNs are shown. The bar graph depicts the frequencies of mature PMNs in the cultures. Each symbol presents values from an individual CRISPRed clone, WT (white or grey bars and black symbols, N=2), *Pcyox11* KO (red bar and symbols, N=3) and *SerpinB1a* KO (white bar and green symbols, N=3) PMNs. Data are presented as mean values with SD. Ordinary one-way ANOVA with Sidak's multiple comparisons test and an overall  $P = 0.0001$ . Data are representative of two independent experiments (N=2). Source data are provided as a Source Data file. **d.** WB analysis for SerpinB1a in WT and *Pcyox11* CRISPRed (clone 1 and clone 3). Neutrophil progenitors from

*Pcyox11* CRISPRed clones 1 (lanes 1 and 2) and 3 (lanes 3 and 4), Serpin B1a CRISPRRed (lanes 5 and 6) and WT (lanes 7 and 8) clones were matured *in vitro* with 20 ng/ml GCSF (G) and 20 ng/ml GCSF combined with 5 ng/ml GM-CSF (GG) for 3 days. 25µg of total cell lysates were resolved on SDS-PAGE and the WB was probed with anti-SerpinB1a and anti-GAPDH antibodies. The lysates from the *SerpinB1a* CRISPRed KO PMNs which were prepared from cells matured with GCSF (G) or GCSF and GM-CSF (GG) stimulations were used to validate the anti-SerpinB1a antibody immunoreactivity (lanes 5 and 6). The GAPDH WB image is overlaid with the StainFree image of the same gel to generate a composite image. Molecular weight markers in kDa are indicated to the left. Data are representative of two independent experiments (N=2). Uncropped WB images are provided under the WB data section of this document. Data show reduced presence of SerpinB1a in the *Pcyox11* CRISPRed PMNs. Because SerpinB1a controls PMN viability, it is likely that the relative decrease in SerpinB1a protein levels account for the diminished viability of *Pcyox11* CRISPRed PMNs. Cumulatively, data show reduced frequencies of matured neutrophils indicative of a significant viability defects in the absence of *Pcyox11*, SerpinB1a, and inhibition of prenylation.

**a**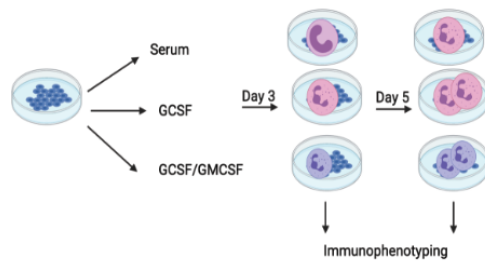**b**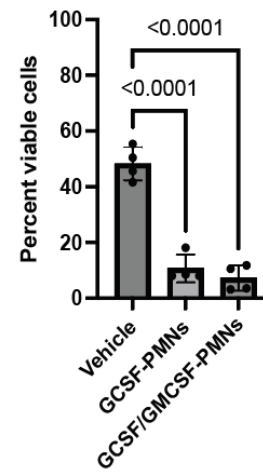**c**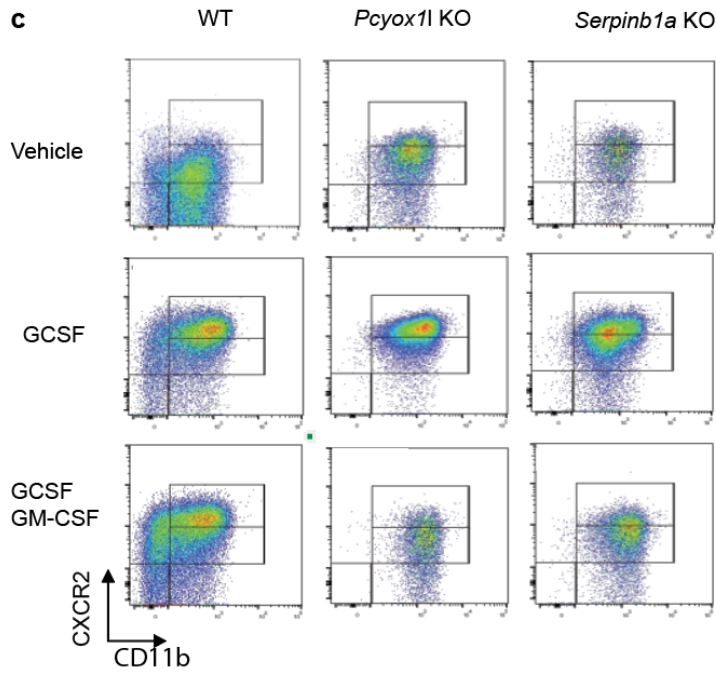

Frequencies of mature granulocytes

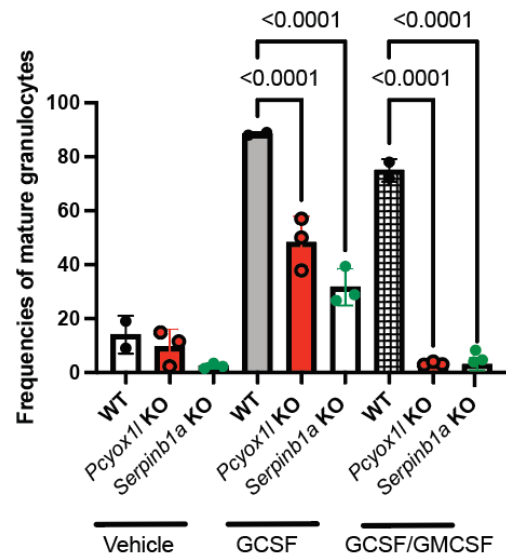**d**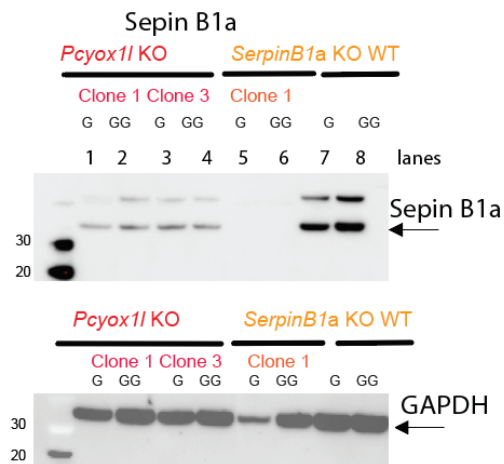

**Supplementary Figure 9. *Pcyox11* CRISPRed neutrophils show alterations in autophagy.**

1x10<sup>6</sup> neutrophil progenitors were matured under three different conditions: vehicle (10% serum), 20 ng/ml GCSF and a combination of GCSF and 5 ng/ml GM-CSF. Cells were treated with 50  $\mu$ M autophagy maturation blocker chloroquine (C) or vehicle (DMSO) for 4h on day 3 of maturation. 25 $\mu$ g cellular lysates were examined by WB for LC3 and GAPDH reactivity. Data are representative of two independent experiments with at least two different CRISPR-ed *Pcyox11* CRISPRed clones to exclude clone-specific effects (N=2). Left panels show WB for LC3 and GAPDH on lysates from WT and *Pcyox11* CRISPRed PMNs matured in vehicle. The middle panels depict LC3 and GAPDH WB analysis of lysates from WT and *Pcyox11* CRISPRed matured with 20 ng/ml GCSF (G) stimulations. Right panels depict LC3 and GAPDH WB analysis of lysates from WT and *Pcyox11* CRISPRed cells matured with GCSF and GM-CSF (GG) stimulations. The presence or absence of chloroquine is indicated as +/-C. The images show non-adjacent lanes on the same WB delineated by black lines. The uncropped WB images are supplied under full size WB images section of this document. Molecular weight markers in kDa are indicated to the left. The GAPDH image is overexposed to show ladder. Ratios of LC3II to GAPDH band intensities were quantified. The quantifications were done using GAPDH densities of non-overexposed bands. Cumulatively, data demonstrate that in the absence of *Pcyox11*, the autophagy flux is diminished, while the LC3 degradation is elevated in the *Pcyox11* CRISPRed PMNs.

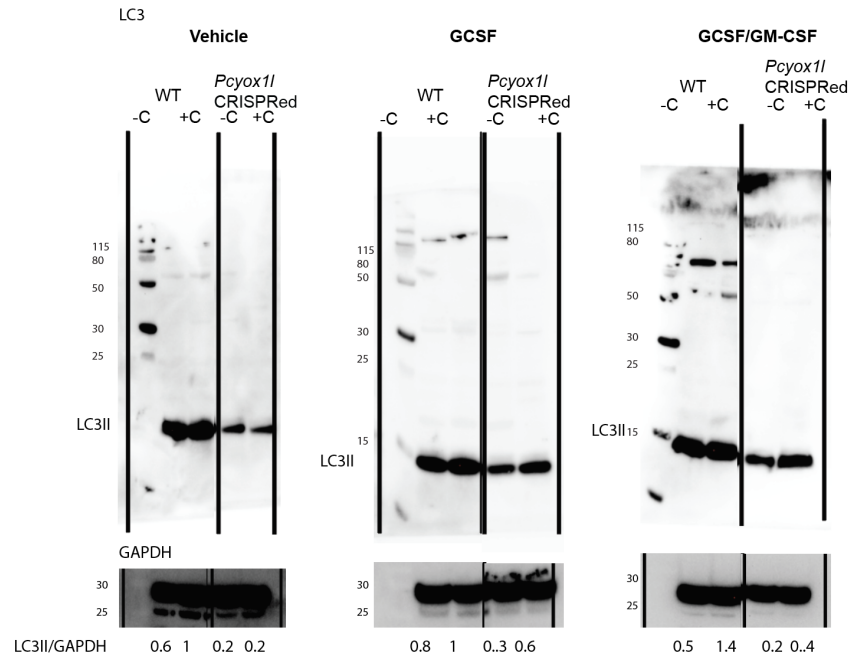

**Supplementary Figure 10.** *Pcyox11* CRISPRed neutrophils show decreases in the signaling scaffolding protein p62/SQSTM1, a selective receptor for mitophagy. WB analysis for p62 in lysates from  $1 \times 10^6$  WT and *Pcyox11* CRISPRed-out PMNs matured with vehicle (V), GCSF (G), or GCSF and GM-CSF (GG) stimulations. Protein lysates were harvested from D3 matured cells and 25 $\mu$ g of lysates were loaded on SDS-PAGE. p62 and GAPDH were detected by WB. Molecular weight markers in kDa are indicated to the left. Ratios of p62 to GAPDH band densities were quantified. Data are representative of two independent experiments (N=2). The uncropped WB images are supplied under full size WB images section of this document. Data show significant decreases in p62 levels in the absence of *Pcyox11*, suggestive of diminished flux to autophagy/mitophagy.



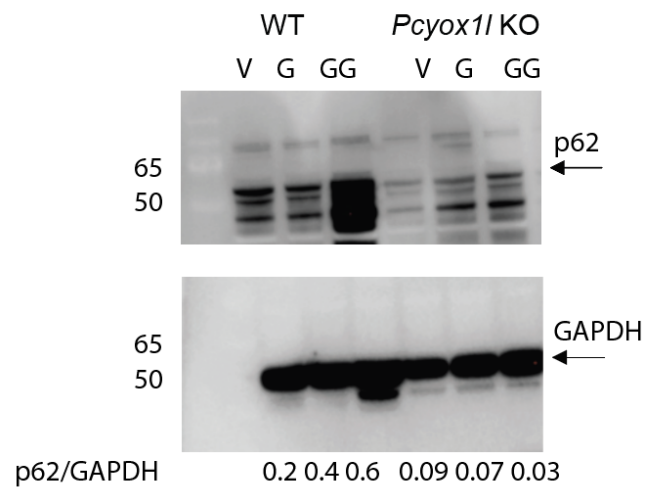

**Supplementary Figure 11.** Flow cytometry gating strategy for neutrophil characterization in the BM, blood, and spleen. The cell population were gated on singlets, viable cells, CD45<sup>+</sup>, CD11b<sup>+</sup>, Gr-1<sup>+</sup> cells.

Flow cytometry gating strategy (example: bone marrow)

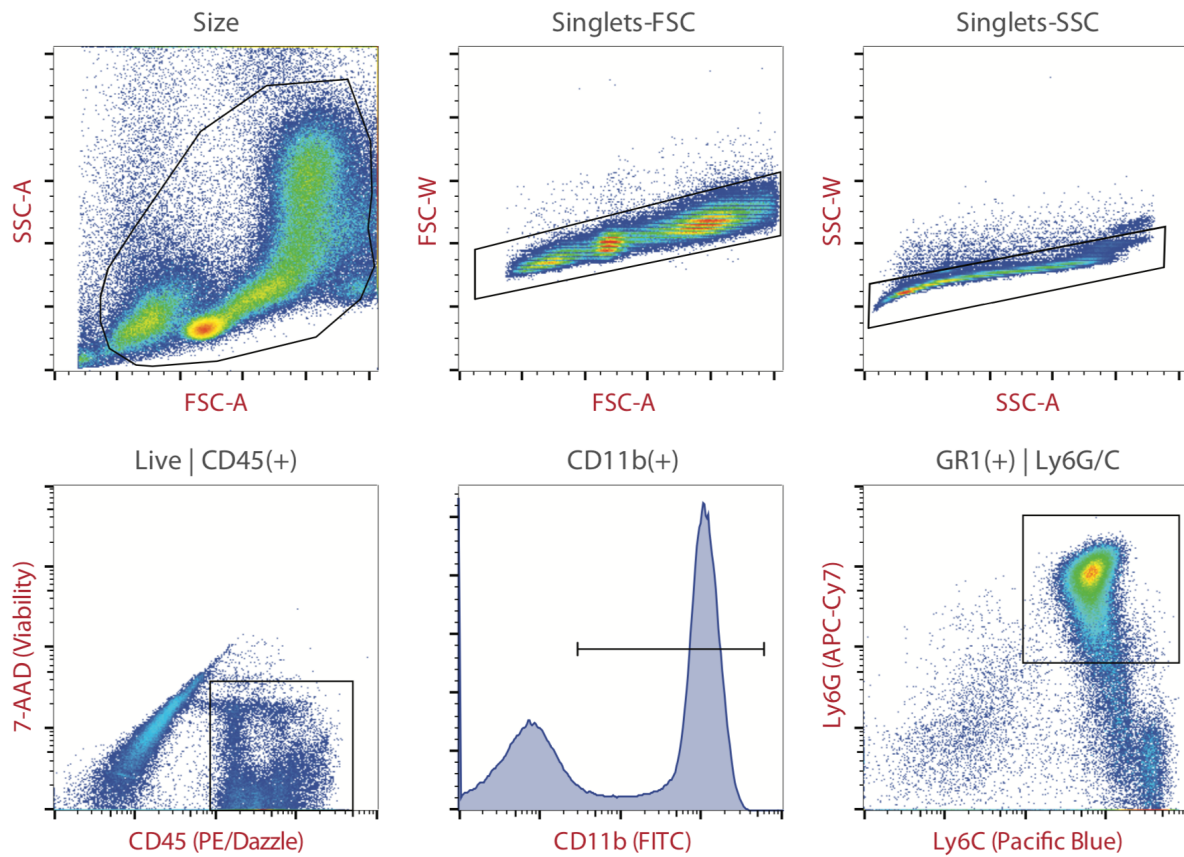

## Supplementary Figure 12. Hematopoietic characterization of *Pcyox11* KO mice under homeostatic conditions

Complete peripheral blood counts of healthy (uninfected) wild-type (blue symbols, N=11) and *Pcyox11* KO (red symbols, N=11) mice showed no differences in (a) white blood cell count, (b) hematocrit, or (c) absolute neutrophil count. Two-tailed unpaired *t*-test, ns. Flow cytometry was used to enumerate myeloid cells (CD45<sup>+</sup>, CD11b<sup>+</sup>) and neutrophils (CD45<sup>+</sup>, GR1<sup>+</sup>) in the (d) peripheral blood, (e) spleen, and (f) bone marrow. There was a small but significant reduction in the number of myeloid cells in the bone marrow in the *Pcyox11* KO mice. Two-tailed unpaired *t*-test, P=0.01. Each symbol presents values from individual mouse. Data are provided as a Source Data file. Data are representative of two independent experiments.

### Complete Blood Counts

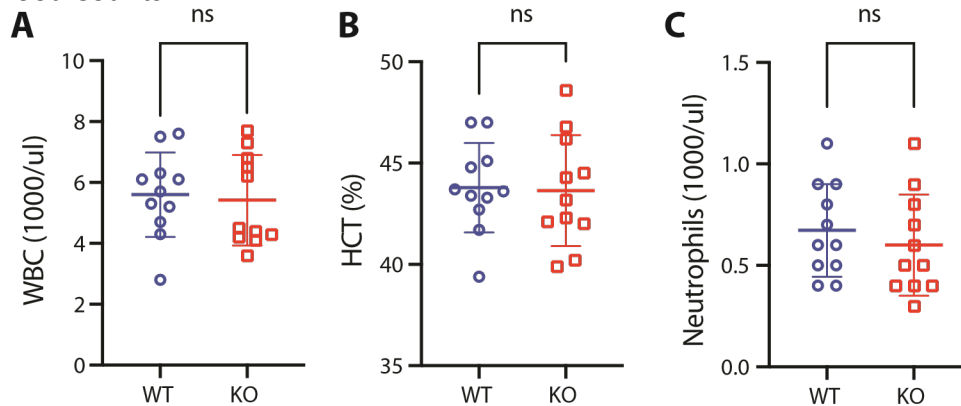

### Flow Cytometry

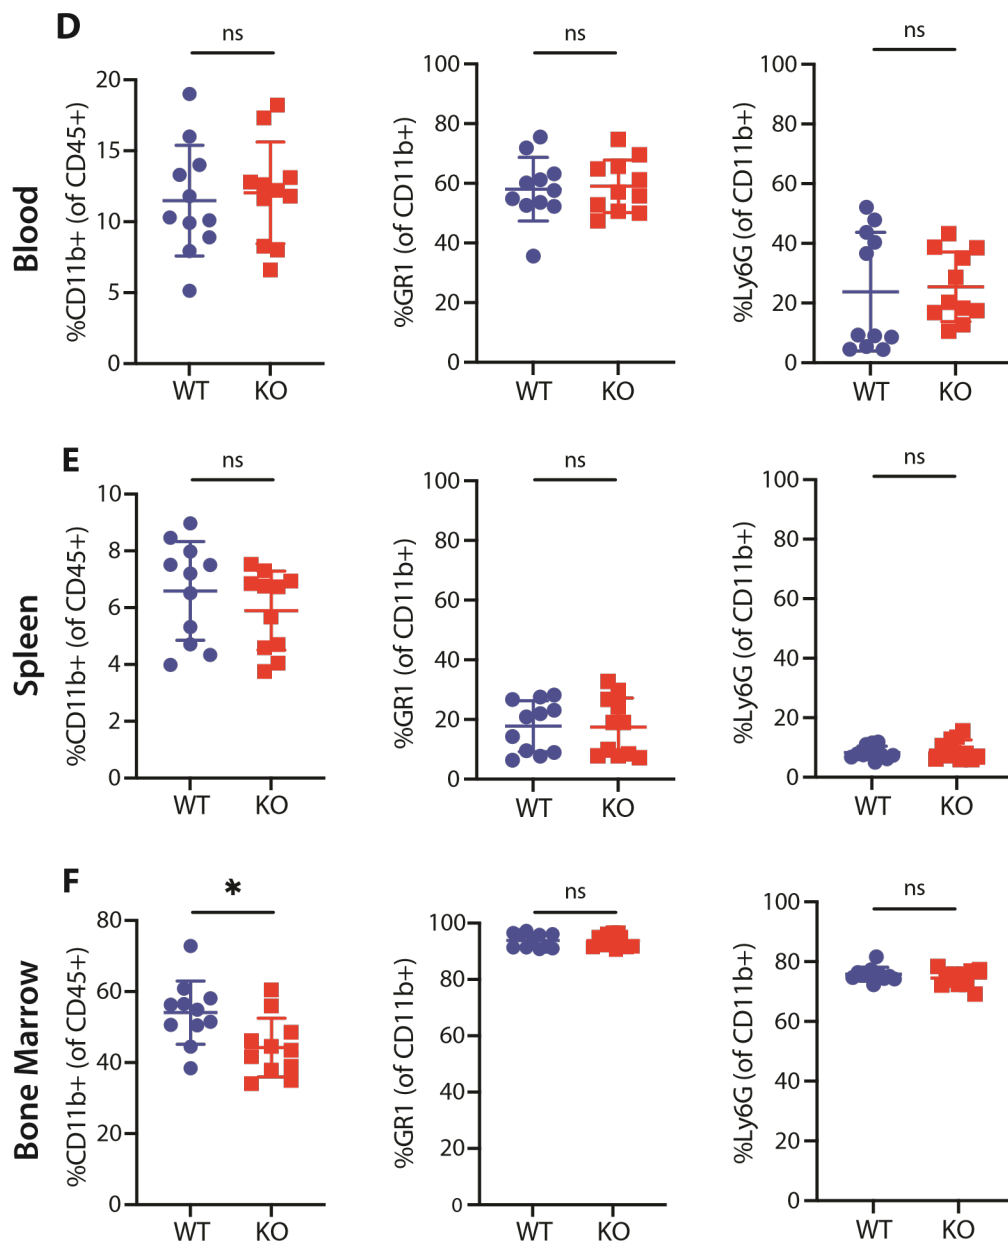

Full size WB images  
Suppl. Fig. 7d

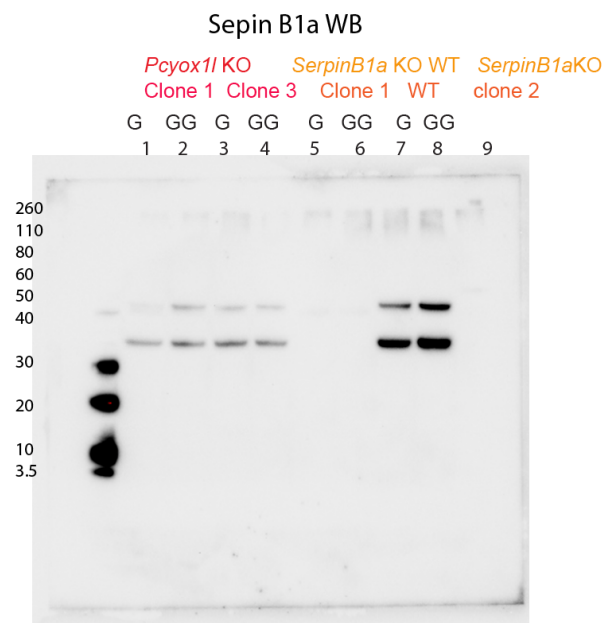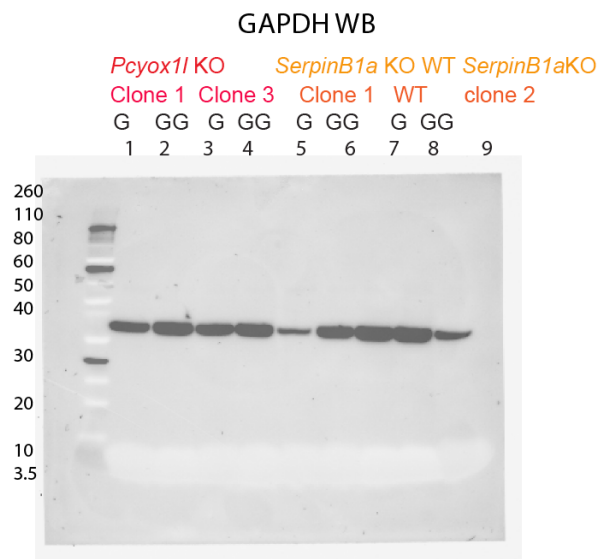

Full size WB Suppl. Fig. 9

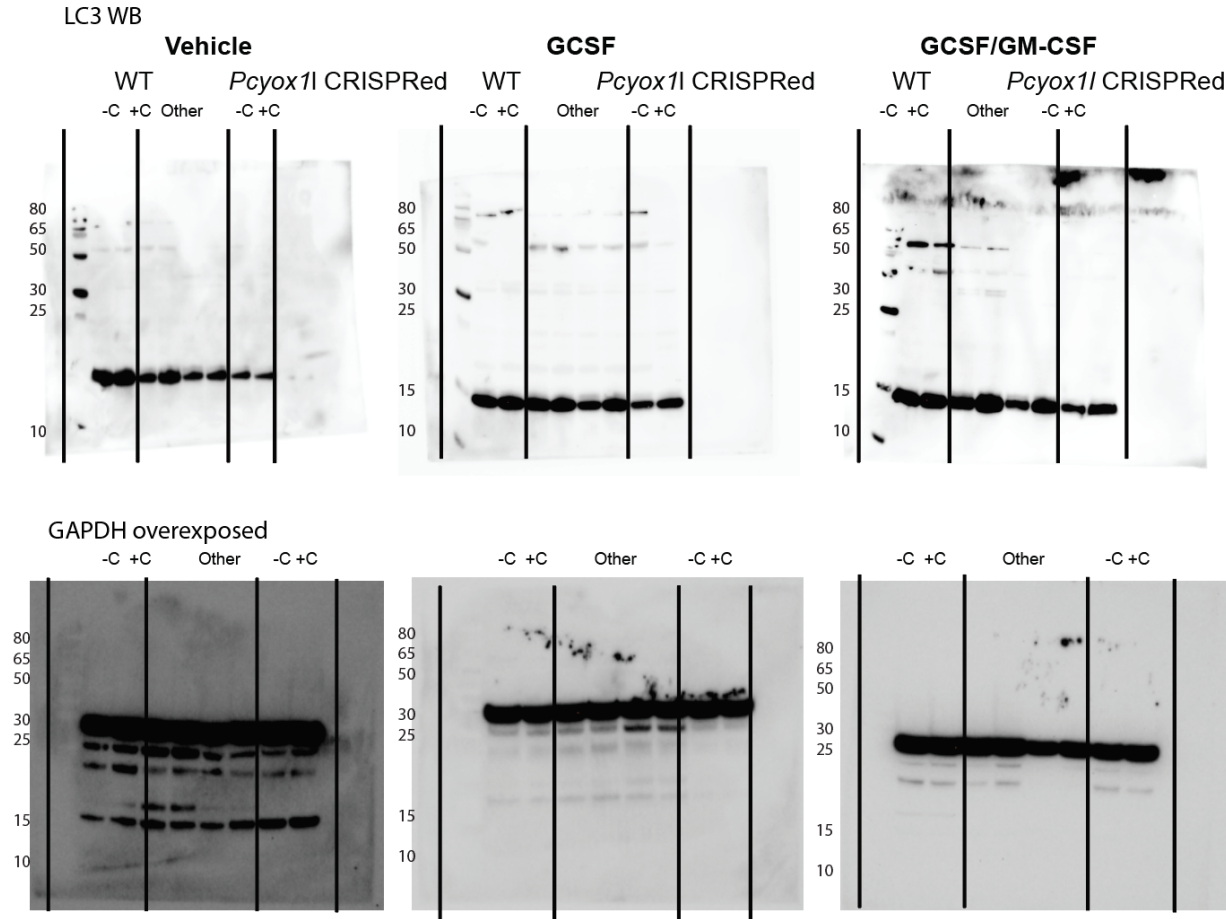

Full size WB Suppl. Fig. 10

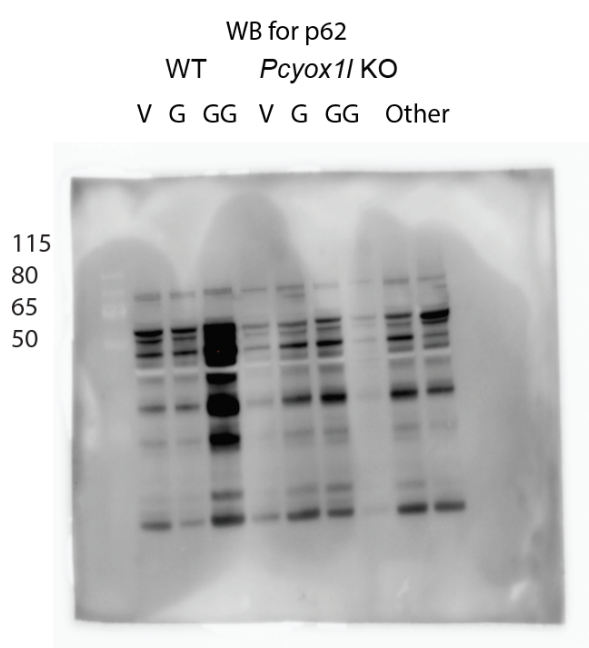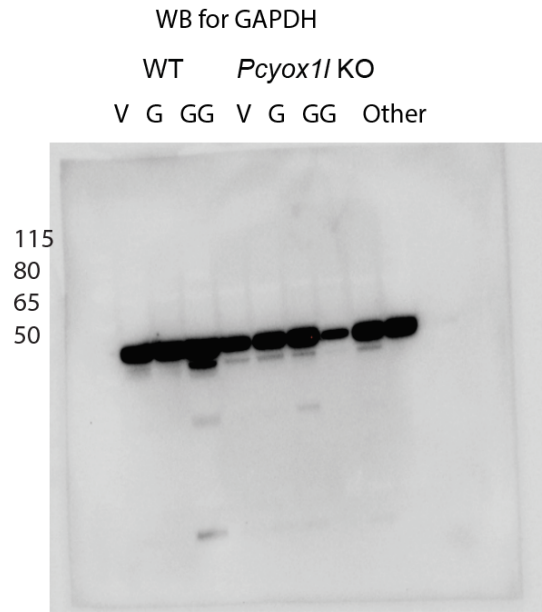

Supplement: MOESM1 [file 41467_2023_38447_MOESM1_ESM.pdf]
